# Supplementary material
Source: Copernicus journal article supplement (doi:10.5194/egusphere-2026-1719)
Supplement: Supplementary file 1 [file egusphere-2026-1719-supplement.pdf]

**Table S1: Building height (m), density (%), building width (m), road width (m) and urban fraction (0-1) for each LCZ class.**

| LCZ Classes | Building height (m)    |               | Density per 5m classes (%) |               | Building width (m)     |               | Road width (m)         |               | Urban fraction (0-1)   |               |
|-------------|------------------------|---------------|----------------------------|---------------|------------------------|---------------|------------------------|---------------|------------------------|---------------|
|             | WRF v4.6.0 (and later) | EO Paris Data | WRF v4.6.0 (and later)     | EO Paris Data | WRF v4.6.0 (and later) | EO Paris Data | WRF v4.6.0 (and later) | EO Paris Data | WRF v4.6.0 (and later) | EO Paris Data |
| LCZ 1       | 40                     | 40            | 17                         | 17            | 22.22                  | 22.22         | 20                     | 20            | 0.95                   | 0.95          |
|             | 45                     | 45            | 21                         | 21            |                        |               |                        |               |                        |               |
|             | 50                     | 50            | 24                         | 24            |                        |               |                        |               |                        |               |
|             | 55                     | 55            | 21                         | 21            |                        |               |                        |               |                        |               |
|             | 60                     | 60            | 17                         | 17            |                        |               |                        |               |                        |               |
| LCZ 2       |                        | 5             |                            | 0.9           | 22                     | 35.6          | 14                     | 9.4           | 0.9                    | 0.84          |
|             |                        | 10            |                            | 17.3          |                        |               |                        |               |                        |               |
|             | 15                     | 15            | 50                         | 14.8          |                        |               |                        |               |                        |               |
|             | 20                     | 20            | 50                         | 19.2          |                        |               |                        |               |                        |               |
|             |                        | 25            |                            | 30.5          |                        |               |                        |               |                        |               |
|             |                        | 30            |                            | 10.8          |                        |               |                        |               |                        |               |
|             |                        | 35            |                            | 3.7           |                        |               |                        |               |                        |               |
|             |                        | 40            |                            | 1.3           |                        |               |                        |               |                        |               |
|             |                        | 45            |                            | 0.5           |                        |               |                        |               |                        |               |
|             |                        | 50            |                            | 0.3           |                        |               |                        |               |                        |               |
|             |                        | 55            |                            | 0.2           |                        |               |                        |               |                        |               |
|             |                        | 60            |                            | 0.1           |                        |               |                        |               |                        |               |
|             | 65                     |               | 0.4                        |               |                        |               |                        |               |                        |               |

Table S1: (Continued)

| LCZ Classes | Building height (m)    |               | Density per 5m classes (%) |               | Building width (m)     |               | Road width (m)         |               | Urban fraction (0-1)   |               |
|-------------|------------------------|---------------|----------------------------|---------------|------------------------|---------------|------------------------|---------------|------------------------|---------------|
|             | WRF v4.6.0 (and later) | EO Paris Data | WRF v4.6.0 (and later)     | EO Paris Data | WRF v4.6.0 (and later) | EO Paris Data | WRF v4.6.0 (and later) | EO Paris Data | WRF v4.6.0 (and later) | EO Paris Data |
| LCZ 3       | 5                      | 5             | 72                         | 2.8           | 9.6                    | 52.2          | 5.2                    | 9.4           | 0.85                   | 0.81          |
|             | 10                     | 10            | 28                         | 50.2          |                        |               |                        |               |                        |               |
|             |                        | 15            |                            | 22.8          |                        |               |                        |               |                        |               |
|             |                        | 20            |                            | 13            |                        |               |                        |               |                        |               |
|             |                        | 25            |                            | 8             |                        |               |                        |               |                        |               |
|             |                        | 30            |                            | 2.6           |                        |               |                        |               |                        |               |
|             |                        | 35            |                            | 0.5           |                        |               |                        |               |                        |               |
|             |                        | 40            |                            | 0.1           |                        |               |                        |               |                        |               |
| LCZ 4       |                        | 5             |                            | 1.4           | 42.86                  | 43.5          | 50                     | 10.9          | 0.65                   | 0.68          |
|             |                        | 10            |                            | 27.4          |                        |               |                        |               |                        |               |
|             |                        | 15            |                            | 16.7          |                        |               |                        |               |                        |               |
|             |                        | 20            |                            | 9.1           |                        |               |                        |               |                        |               |
|             |                        | 25            |                            | 29.3          |                        |               |                        |               |                        |               |
|             |                        | 30            |                            | 9             |                        |               |                        |               |                        |               |
|             |                        | 35            |                            | 1.7           |                        |               |                        |               |                        |               |
|             | 40                     | 40            | 17                         | 0.5           |                        |               |                        |               |                        |               |
|             | 45                     | 45            | 21                         | 0.3           |                        |               |                        |               |                        |               |
|             | 50                     | 50            | 24                         | 0.9           |                        |               |                        |               |                        |               |
|             | 55                     | 55            | 21                         | 0.3           |                        |               |                        |               |                        |               |
|             | 60                     | 60            | 17                         | 0.7           |                        |               |                        |               |                        |               |
|             |                        | 65            |                            | 0.3           |                        |               |                        |               |                        |               |
|             |                        | 95            |                            | 2             |                        |               |                        |               |                        |               |
|             | 105                    |               | 0.4                        |               |                        |               |                        |               |                        |               |

Table S1: (Continued)

| LCZ Classes | Building height (m)    |               | Density per 5m classes (%) |               | Building width (m)     |               | Road width (m)         |               | Urban fraction (0-1)   |               |
|-------------|------------------------|---------------|----------------------------|---------------|------------------------|---------------|------------------------|---------------|------------------------|---------------|
|             | WRF v4.6.0 (and later) | EO Paris Data | WRF v4.6.0 (and later)     | EO Paris Data | WRF v4.6.0 (and later) | EO Paris Data | WRF v4.6.0 (and later) | EO Paris Data | WRF v4.6.0 (and later) | EO Paris Data |
| LCZ 5       |                        | 5             |                            | 2.6           | 26.25                  | 31.5          | 35                     | 11.3          | 0.7                    | 0.73          |
|             |                        | 10            |                            | 45.3          |                        |               |                        |               |                        |               |
|             | 15                     | 15            | 50                         | 19.5          |                        |               |                        |               |                        |               |
|             | 20                     | 20            | 50                         | 11.1          |                        |               |                        |               |                        |               |
|             |                        | 25            |                            | 9.9           |                        |               |                        |               |                        |               |
|             |                        | 30            |                            | 5.2           |                        |               |                        |               |                        |               |
|             |                        | 35            |                            | 3.2           |                        |               |                        |               |                        |               |
|             |                        | 40            |                            | 1.4           |                        |               |                        |               |                        |               |
|             |                        | 45            |                            | 0.7           |                        |               |                        |               |                        |               |
|             |                        | 50            |                            | 0.4           |                        |               |                        |               |                        |               |
|             |                        | 55            |                            | 0.3           |                        |               |                        |               |                        |               |
|             |                        | 60            |                            | 0.1           |                        |               |                        |               |                        |               |
|             | 65                     |               | 0.3                        |               |                        |               |                        |               |                        |               |
| LCZ 6       | 5                      | 5             | 72                         | 10            | 13                     | 21            | 13                     | 9.15          | 0.6                    | 0.56          |
|             | 10                     | 10            | 28                         | 71.5          |                        |               |                        |               |                        |               |
|             |                        | 15            |                            | 10.9          |                        |               |                        |               |                        |               |
|             |                        | 20            |                            | 4.5           |                        |               |                        |               |                        |               |
|             |                        | 25            |                            | 1.4           |                        |               |                        |               |                        |               |
|             |                        | 30            |                            | 0.7           |                        |               |                        |               |                        |               |
|             |                        | 35            |                            | 0.5           |                        |               |                        |               |                        |               |
|             |                        | 40            |                            | 0.2           |                        |               |                        |               |                        |               |
|             |                        | 45            |                            | 0.1           |                        |               |                        |               |                        |               |
|             |                        | 50            |                            | 0.2           |                        |               |                        |               |                        |               |
| LCZ 7       | 5                      | 100           | 5                          | 100           | 25                     | 25            | 3.33                   | 3.33          | 0.85                   | 0.85          |

Table S1: (Continued)

| LCZ Classes | Building height (m)    |               | Density per 5m classes (%) |               | Building width (m)     |               | Road width (m)         |               | Urban fraction (0-1)   |               |
|-------------|------------------------|---------------|----------------------------|---------------|------------------------|---------------|------------------------|---------------|------------------------|---------------|
|             | WRF v4.6.0 (and later) | EO Paris Data | WRF v4.6.0 (and later)     | EO Paris Data | WRF v4.6.0 (and later) | EO Paris Data | WRF v4.6.0 (and later) | EO Paris Data | WRF v4.6.0 (and later) | EO Paris Data |
| LCZ 8       | 5                      | 5             | 72                         | 2.7           | 28.9                   | 28.7          | 32.5                   | 16.1          | 0.85                   | 0.78          |
|             | 10                     | 10            | 28                         | 51.3          |                        |               |                        |               |                        |               |
|             |                        | 15            |                            | 26.3          |                        |               |                        |               |                        |               |
|             |                        | 20            |                            | 10.2          |                        |               |                        |               |                        |               |
|             |                        | 25            |                            | 4.8           |                        |               |                        |               |                        |               |
|             |                        | 30            |                            | 2.4           |                        |               |                        |               |                        |               |
|             |                        | 35            |                            | 1.2           |                        |               |                        |               |                        |               |
|             |                        | 40            |                            | 0.4           |                        |               |                        |               |                        |               |
|             |                        | 45            |                            | 0.2           |                        |               |                        |               |                        |               |
|             |                        | 50            |                            | 0.1           |                        |               |                        |               |                        |               |
|             | 55                     |               | 0.2                        |               |                        |               |                        |               |                        |               |
| LCZ 9       | 5                      | 5             | 72                         | 4.8           | 43.33                  | 26.8          | 43.33                  | 10.1          | 0.3                    | 0.3           |
|             | 10                     | 10            | 28                         | 43.6          |                        |               |                        |               |                        |               |
|             |                        | 15            |                            | 14.3          |                        |               |                        |               |                        |               |
|             |                        | 20            |                            | 12.1          |                        |               |                        |               |                        |               |
|             |                        | 25            |                            | 13.8          |                        |               |                        |               |                        |               |
|             |                        | 30            |                            | 7.3           |                        |               |                        |               |                        |               |
|             |                        | 35            |                            | 3.1           |                        |               |                        |               |                        |               |
|             |                        | 40            |                            | 0.9           |                        |               |                        |               |                        |               |
|             |                        | 50            |                            | 0.1           |                        |               |                        |               |                        |               |
| LCZ 10      | 5                      | 5             | 16                         | 16            | 23.8                   | 23.8          | 28.6                   | 28.6          | 0.55                   | 0.55          |
|             | 10                     | 10            | 68                         | 68            |                        |               |                        |               |                        |               |
|             | 15                     | 15            | 16                         | 16            |                        |               |                        |               |                        |               |
| LCZ E       | 5                      | 5             | 100                        | 100           | 5                      | 5             | 100                    | 100           | 1                      | 1             |

Table S2: Thermal properties of urban surfaces for each LCZ class.

| Properties<br>LCZ Class |      | Albedo                       |                  | Emissivity                   |                  | Heat Capacity<br>(MJ×m <sup>-3</sup> ×K <sup>-1</sup> ) |                  | Thermal<br>Conductivity<br>(J×m <sup>-1</sup> ×sec <sup>-1</sup> ×K <sup>-1</sup> ) |                  |
|-------------------------|------|------------------------------|------------------|------------------------------|------------------|---------------------------------------------------------|------------------|-------------------------------------------------------------------------------------|------------------|
|                         |      | WRF<br>v4.6.0 (and<br>later) | EO Paris<br>Data | WRF<br>v4.6.0 (and<br>later) | EO Paris<br>Data | WRF<br>v4.6.0 (and<br>later)                            | EO Paris<br>Data | WRF<br>v4.6.0 (and<br>later)                                                        | EO Paris<br>Data |
| <b>LCZ 1</b>            | Roof | 0.3                          | 0.13             | 0.9                          | 0.91             | 1.32                                                    | 1.32             | 1.54                                                                                | 1.54             |
|                         | Wall | 0.3                          | 0.25             | 0.9                          | 0.9              | 1.54                                                    | 1.54             | 1.51                                                                                | 1.51             |
|                         | Road | 0.08                         | 0.14             | 0.95                         | 0.95             | 1.74                                                    | 1.74             | 0.82                                                                                | 0.82             |
| <b>LCZ 2</b>            | Roof | 0.3                          | 0.134            | 0.9                          | 0.963            | 1.32                                                    | 1.32             | 1.54                                                                                | 1.54             |
|                         | Wall | 0.3                          | 0.134            | 0.9                          | 0.963            | 1.54                                                    | 1.54             | 1.51                                                                                | 1.51             |
|                         | Road | 0.08                         | 0.114            | 0.95                         | 0.962            | 1.74                                                    | 1.74             | 0.82                                                                                | 0.82             |
| <b>LCZ 3</b>            | Roof | 0.3                          | 0.137            | 0.9                          | 0.965            | 1.32                                                    | 1.32             | 1.54                                                                                | 1.54             |
|                         | Wall | 0.3                          | 0.137            | 0.9                          | 0.965            | 1.54                                                    | 1.54             | 1.51                                                                                | 1.51             |
|                         | Road | 0.08                         | 0.12             | 0.95                         | 0.961            | 1.74                                                    | 1.74             | 0.82                                                                                | 0.82             |
| <b>LCZ 4</b>            | Roof | 0.3                          | 0.144            | 0.9                          | 0.966            | 1.32                                                    | 1.32             | 1.54                                                                                | 1.54             |
|                         | Wall | 0.3                          | 0.144            | 0.9                          | 0.966            | 1.54                                                    | 1.54             | 1.51                                                                                | 1.51             |
|                         | Road | 0.08                         | 0.121            | 0.95                         | 0.96             | 1.74                                                    | 1.74             | 0.82                                                                                | 0.82             |
| <b>LCZ 5</b>            | Roof | 0.3                          | 0.146            | 0.9                          | 0.962            | 1.32                                                    | 1.32             | 1.54                                                                                | 1.54             |
|                         | Wall | 0.3                          | 0.146            | 0.9                          | 0.962            | 1.54                                                    | 1.54             | 1.51                                                                                | 1.51             |
|                         | Road | 0.08                         | 0.127            | 0.95                         | 0.96             | 1.74                                                    | 1.74             | 0.82                                                                                | 0.82             |
| <b>LCZ 6</b>            | Roof | 0.3                          | 0.148            | 0.9                          | 0.965            | 1.32                                                    | 1.32             | 1.54                                                                                | 1.54             |
|                         | Wall | 0.3                          | 0.148            | 0.9                          | 0.965            | 1.54                                                    | 1.54             | 1.51                                                                                | 1.51             |
|                         | Road | 0.08                         | 0.135            | 0.95                         | 0.964            | 1.74                                                    | 1.74             | 0.82                                                                                | 0.82             |
| <b>LCZ 7</b>            | Roof | 0.3                          | 0.15             | 0.9                          | 0.9              | 1.32                                                    | 1.32             | 1.54                                                                                | 1.54             |
|                         | Wall | 0.3                          | 0.2              | 0.9                          | 0.9              | 1.54                                                    | 1.54             | 1.51                                                                                | 1.51             |
|                         | Road | 0.08                         | 0.18             | 0.95                         | 0.92             | 1.74                                                    | 1.74             | 0.82                                                                                | 0.82             |

Table S2: (Continued)

| Properties<br>LCZ Class |      | Albedo                       |                  | Emissivity                   |                  | Heat Capacity<br>(MJ×m <sup>-3</sup> ×K <sup>-1</sup> ) |                  | Thermal<br>Conductivity<br>(J×m <sup>-1</sup> ×sec <sup>-1</sup> ×K <sup>-1</sup> ) |                  |
|-------------------------|------|------------------------------|------------------|------------------------------|------------------|---------------------------------------------------------|------------------|-------------------------------------------------------------------------------------|------------------|
|                         |      | WRF<br>v4.6.0 (and<br>later) | EO Paris<br>Data | WRF<br>v4.6.0 (and<br>later) | EO Paris<br>Data | WRF<br>v4.6.0 (and<br>later)                            | EO Paris<br>Data | WRF<br>v4.6.0 (and<br>later)                                                        | EO Paris<br>Data |
| <b>LCZ 8</b>            | Roof | 0.3                          | 0.16             | 0.9                          | 0.955            | 1.32                                                    | 1.32             | 1.54                                                                                | 1.54             |
|                         | Wall | 0.3                          | 0.16             | 0.9                          | 0.955            | 1.54                                                    | 1.54             | 1.51                                                                                | 1.51             |
|                         | Road | 0.08                         | 0.142            | 0.95                         | 0.955            | 1.74                                                    | 1.74             | 0.82                                                                                | 0.82             |
| <b>LCZ 9</b>            | Roof | 0.3                          | 0.162            | 0.9                          | 0.968            | 1.32                                                    | 1.32             | 1.54                                                                                | 1.54             |
|                         | Wall | 0.3                          | 0.162            | 0.9                          | 0.968            | 1.54                                                    | 1.54             | 1.51                                                                                | 1.51             |
|                         | Road | 0.08                         | 0.127            | 0.95                         | 0.966            | 1.74                                                    | 1.74             | 0.82                                                                                | 0.82             |
| <b>LCZ 10</b>           | Roof | 0.3                          | 0.1              | 0.9                          | 0.91             | 1.32                                                    | 1.32             | 1.54                                                                                | 1.54             |
|                         | Wall | 0.3                          | 0.2              | 0.9                          | 0.9              | 1.54                                                    | 1.54             | 1.51                                                                                | 1.51             |
|                         | Road | 0.08                         | 0.14             | 0.95                         | 0.95             | 1.74                                                    | 1.74             | 0.82                                                                                | 0.82             |
| <b>LCZ E</b>            | Roof | 0.3                          | 0.13             | 0.9                          | 0.95             | 1.32                                                    | 1.32             | 1.54                                                                                | 1.54             |
|                         | Wall | 0.3                          | 0.2              | 0.9                          | 0.95             | 1.54                                                    | 1.54             | 1.51                                                                                | 1.51             |
|                         | Road | 0.08                         | 0.14             | 0.95                         | 0.95             | 1.74                                                    | 1.74             | 0.82                                                                                | 0.82             |

20

25

**Table S3: Coverage (in number of cells and %) of each land use class in Paris region (Île-de-France) for BEP–BEM simulations.**

| <b>LU_INDEX</b> | <b>Category</b>             | <b>No. of Cells</b> | <b>%</b> |
|-----------------|-----------------------------|---------------------|----------|
| 1               | Evergreen Needleleaf Forest | 10                  | 0.8      |
| 4               | Deciduous Broadleaf Forest  | 140                 | 11.15    |
| 12              | Croplands                   | 812                 | 64.65    |
| 52              | LCZ2 - Compact Midrise      | 16                  | 1.27     |
| 54              | LCZ4 - Open High-rise       | 1                   | 0.08     |
| 55              | LCZ5 - Open Midrise         | 39                  | 3.11     |
| 56              | LCZ6 - Open Low-rise        | 198                 | 15.76    |
| 58              | LCZ8 - Large Low-rise       | 39                  | 3.11     |
| 59              | LCZ9 - Sparsely built       | 1                   | 0.08     |
| LCZs Sum        |                             | 294                 | 23.41    |
| Total           |                             | 1256                | 100      |

30

**Table S4: Coverage (in number of cells and %) of each land use class in Paris region (Île-de-France) for BULK simulation.**

| <b>LU_INDEX</b> | <b>Category</b>             | <b>No. of Cells</b> | <b>%</b> |
|-----------------|-----------------------------|---------------------|----------|
| 1               | Evergreen Needleleaf Forest | 10                  | 0.8      |
| 4               | Deciduous Broadleaf Forest  | 149                 | 11.86    |
| 12              | Croplands                   | 888                 | 70.7     |
| 13              | Urban and Built-Up          | 209                 | 16.64    |
| Total           |                             | 1256                | 100      |

35 **Table S5: Statistical analysis (Bias, RMSE, R) of the two simulations using BEP-BEM UCM, concerning stations located at LCZs, during daytime and nighttime hours (indicated as D and N, respectively), for the summer (JJA) of 2020. Temporal correlation (R) is calculated on the totality of the 24h span.**

| Simulations    | CTRL |      |      |      |      |      |      |      | PAR  |      |      |      |      |      |      |      |
|----------------|------|------|------|------|------|------|------|------|------|------|------|------|------|------|------|------|
|                | LCZ2 |      | LCZ5 |      | LCZ6 |      | LCZ8 |      | LCZ2 |      | LCZ5 |      | LCZ6 |      | LCZ8 |      |
| Group Stations | D    | N    | D    | N    | D    | N    | D    | N    | D    | N    | D    | N    | D    | N    | D    | N    |
| Day Period     | D    | N    | D    | N    | D    | N    | D    | N    | D    | N    | D    | N    | D    | N    | D    | N    |
| Bias (°C)      | 1.45 | 2.23 | 0.96 | 2.76 | 0.84 | 2.37 | 0.77 | 1.43 | 2.71 | 2.19 | 1.52 | 2.36 | 1.08 | 2.01 | 0.67 | 1.13 |
| RMSE (°C)      | 3.06 | 3.18 | 2.8  | 3.89 | 2.58 | 3.46 | 2.52 | 2.48 | 4.13 | 3.44 | 3.34 | 3.62 | 2.92 | 3.23 | 2.75 | 2.73 |
| R              | 0.87 |      | 0.85 |      | 0.87 |      | 0.88 |      | 0.86 |      | 0.85 |      | 0.86 |      | 0.88 |      |

40

**Table S6: Statistical analysis (Bias, RMSE, R) of the three simulations concerning group stations (Urban, Non-Urban) during daytime and nighttime hours (indicated as D and N, respectively), for the heatwave of August 2020. Temporal correlation (R) is calculated on the totality of the 24h span.**

| Simulations    | BULK  |      |           |      | CTRL  |      |           |      | PAR   |      |           |      |
|----------------|-------|------|-----------|------|-------|------|-----------|------|-------|------|-----------|------|
|                | Urban |      | Non-Urban |      | Urban |      | Non-Urban |      | Urban |      | Non-Urban |      |
| Group Stations | D     | N    | D         | N    | D     | N    | D         | N    | D     | N    | D         | N    |
| Day Period     | D     | N    | D         | N    | D     | N    | D         | N    | D     | N    | D         | N    |
| Bias (°C)      | 1.45  | 3.52 | 0.43      | 4.02 | 0.53  | 4.25 | 0.04      | 3.93 | 1.47  | 4.64 | -0.29     | 3.95 |
| RMSE (°C)      | 4.04  | 4.74 | 3.95      | 4.91 | 2.98  | 5.13 | 3.38      | 4.68 | 3.68  | 5.65 | 3.26      | 4.62 |
| R              | 0.76  |      | 0.79      |      | 0.80  |      | 0.85      |      | 0.78  |      | 0.86      |      |

45

**Table S7: Same as Table S5, but for the heatwave of August 2020.**

| Simulations    | CTRL |      |      |     |      |      |      |      | PAR  |      |      |      |      |      |      |      |
|----------------|------|------|------|-----|------|------|------|------|------|------|------|------|------|------|------|------|
|                | LCZ2 |      | LCZ5 |     | LCZ6 |      | LCZ8 |      | LCZ2 |      | LCZ5 |      | LCZ6 |      | LCZ8 |      |
| Group Stations | D    | N    | D    | N   | D    | N    | D    | N    | D    | N    | D    | N    | D    | N    | D    | N    |
| Day Period     | D    | N    | D    | N   | D    | N    | D    | N    | D    | N    | D    | N    | D    | N    | D    | N    |
| Bias (°C)      | 0.89 | 4.05 | 0.41 | 5.4 | 0.53 | 4.57 | 0.44 | 2.13 | 2.61 | 4.71 | 1.15 | 5.42 | 1.05 | 4.74 | 0.55 | 2.82 |
| RMSE (°C)      | 3.2  | 4.7  | 3.42 | 6.1 | 2.98 | 5.35 | 2.73 | 3.03 | 4.23 | 5.62 | 3.76 | 6.56 | 3.26 | 5.89 | 3.08 | 4.13 |
| R              | 0.79 |      | 0.76 |     | 0.84 |      | 0.83 |      | 0.76 |      | 0.79 |      | 0.86 |      | 0.81 |      |

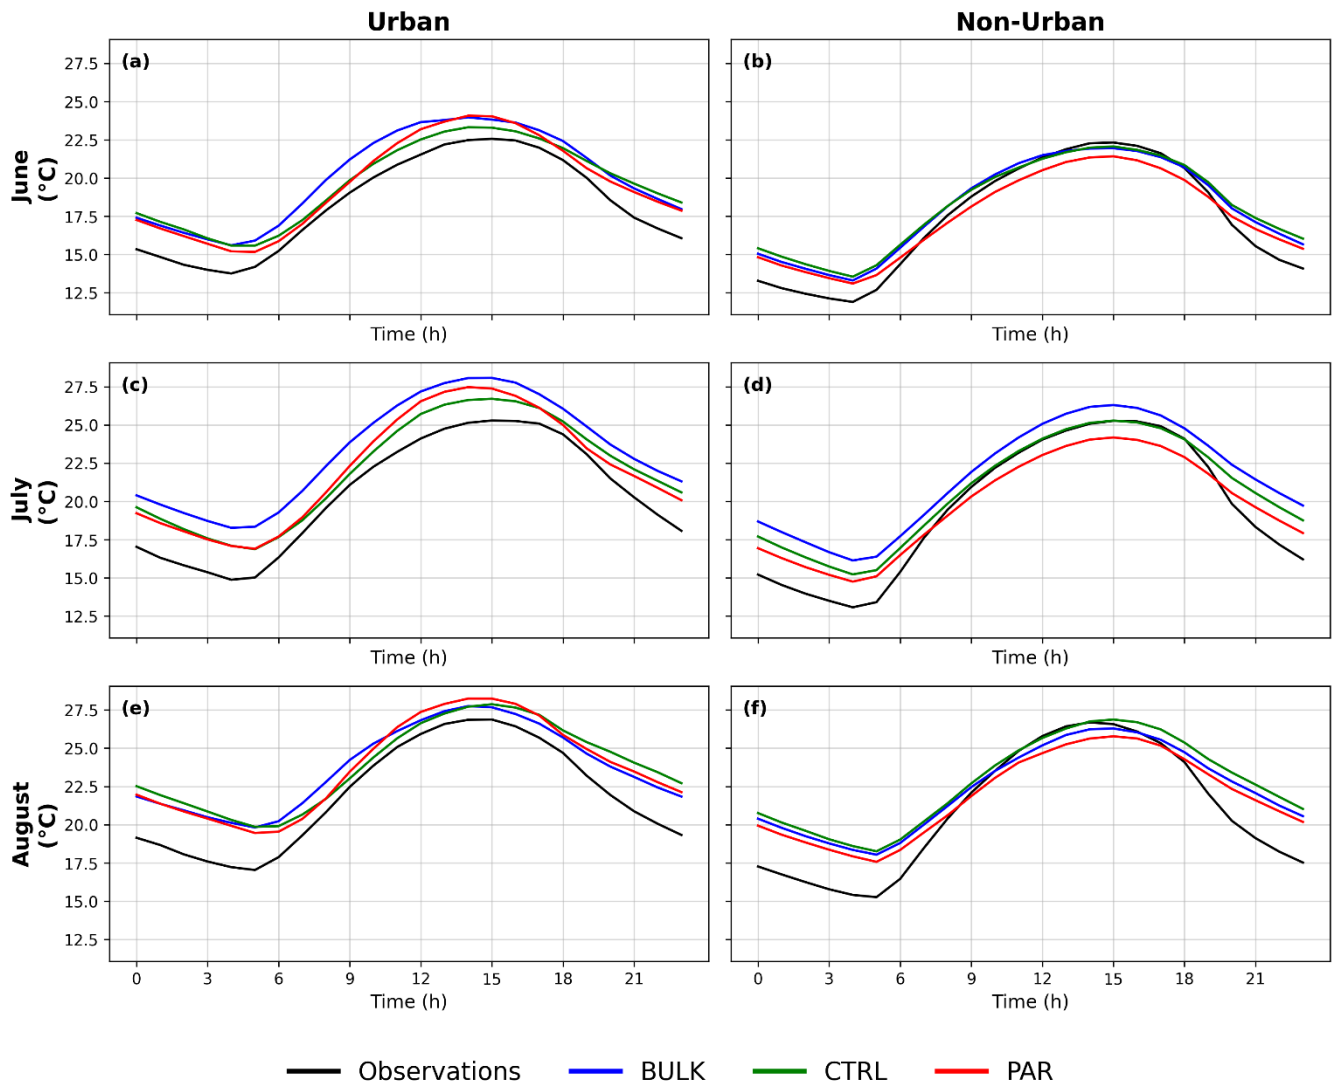

50 **Figure S1: Daily profiles of 2 m air temperature of observations (black), BULK (blue), CTRL (green) and PAR (red) for Urban and Non-Urban stations, respectively, in (a,b) June; (c,d) July and (e,f) August.**

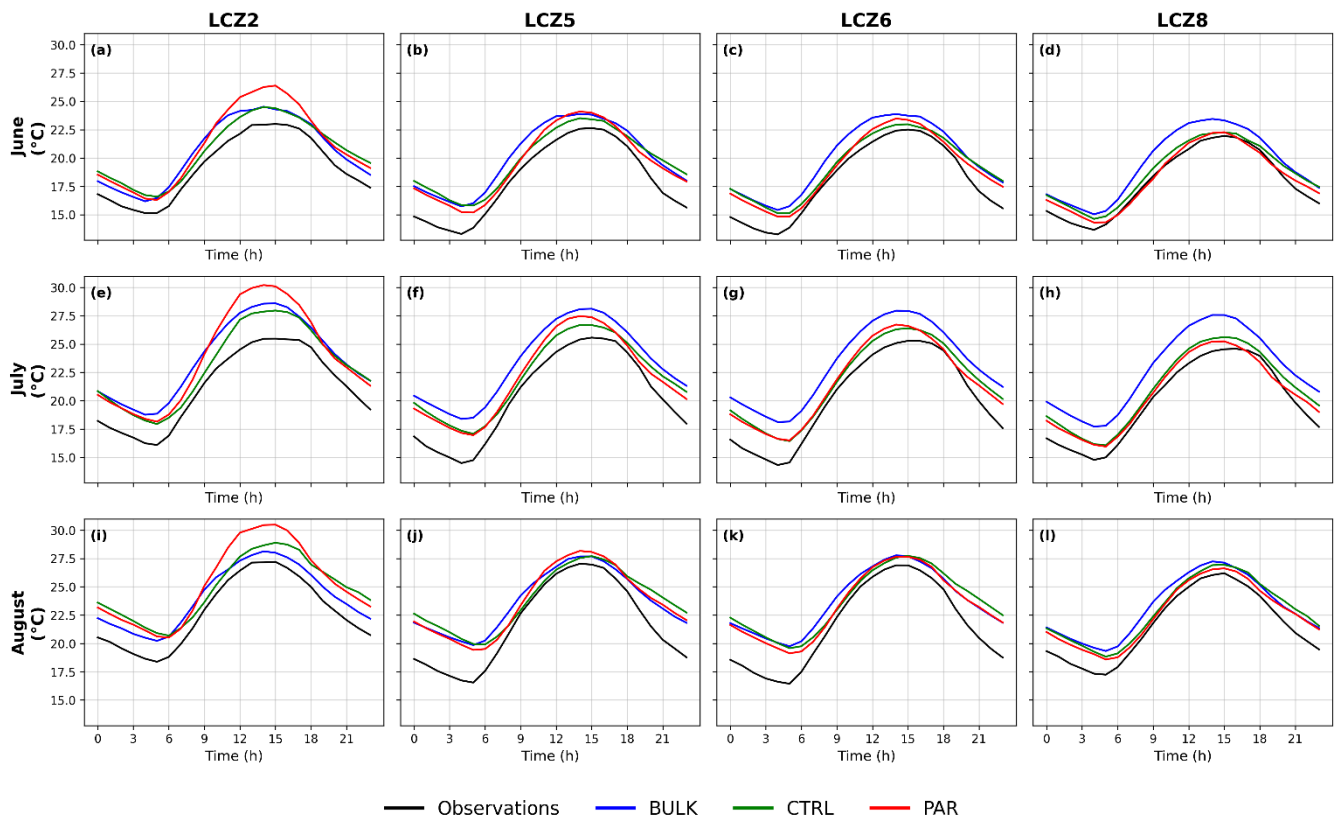

55 **Figure S2: Daily profiles of 2 m air temperature of observations (black), BULK (blue), CTRL (green) and PAR (red) for LCZs in (a), (b), (c), (d) June; (e), (f), (g), (h) July and (i), (j), (k), (l) August.**

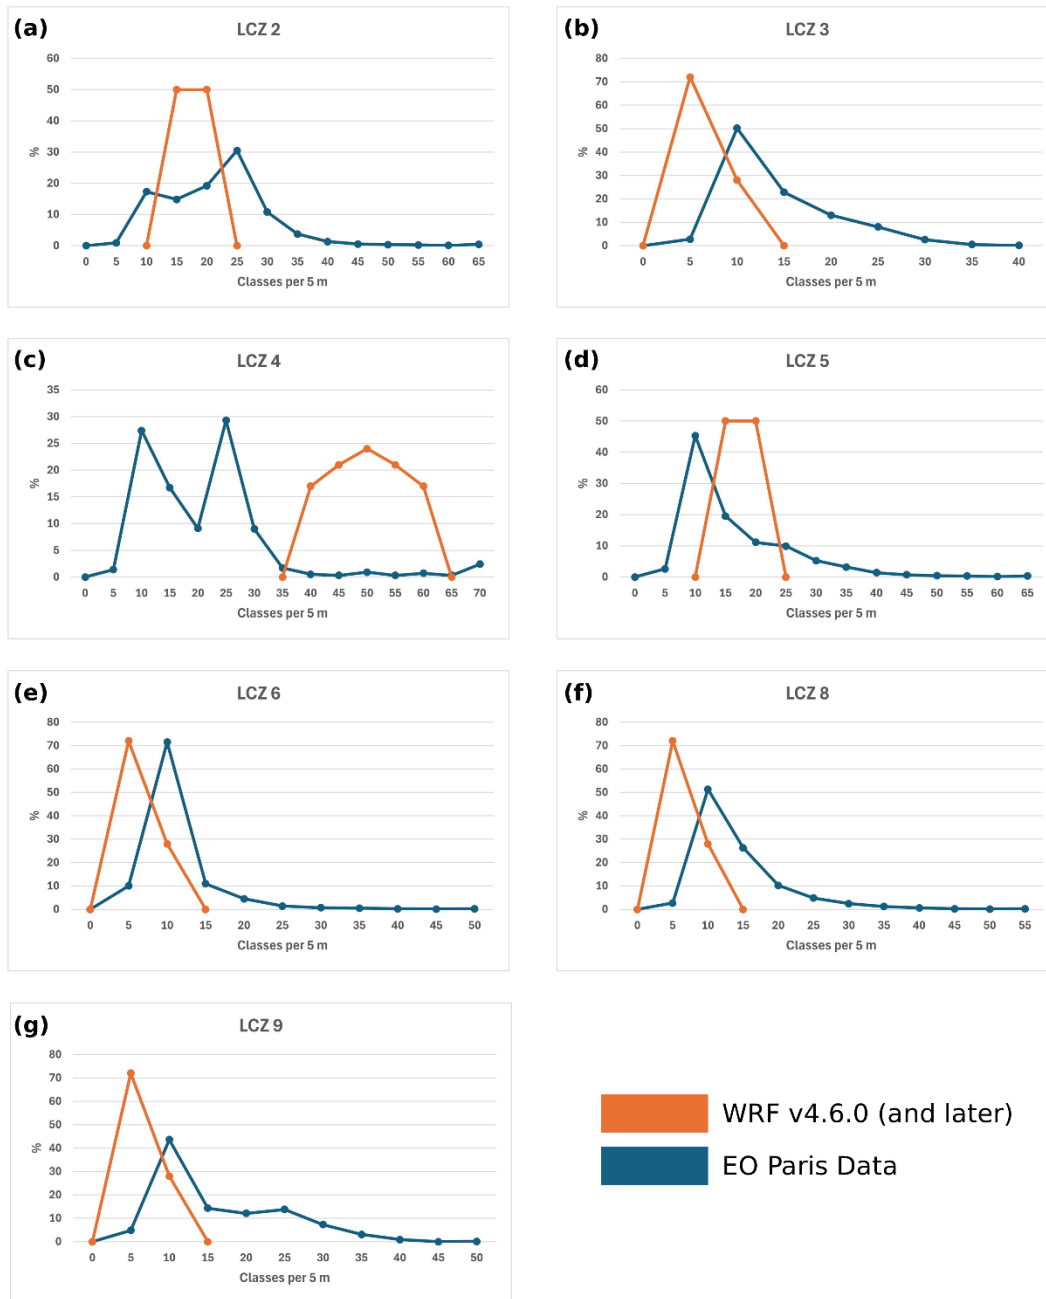

**Figure S3:** Building height distribution for: (a) LCZ 2, (b) LCZ 3, (c) LCZ 4, (d) LCZ 5, (e) LCZ 6, (f) LCZ 8, (g) LCZ 9, regarding data in WRF v4.6.0 and later (orange) and EO Paris data (blue dotted colored line), used in CTRL and PAR simulations, respectively.
